# Supplementary material
Source: PubMed Central journal article supplement (PMC3186872)
Supplement: NIHMS318517-supplement-1.pdf [file NIHMS318517-supplement-1.pdf]

## Supplemental Figure 1

### Oligonucleotide Primers used in this study

#### RT-PCR primers

| mRNA  | Forward (5'- 3')             | Reverse (5'- 3')          |
|-------|------------------------------|---------------------------|
| Rad21 | ATTACGGACATCAGGACATCTC       | AAGCCATCTTTATCTTAATGAATGC |
| CIITA | CTGAAGGATGTGGAAGACCTGGGAAAGC | GTCCCCGATCTTGTCTCACTC     |
| RFX5  | AGAGCGGAAGAAGAGTGTAGTTGAG    | GAATAGGTGGAGAGACTGGGATTGG |
| DRA   | GCGAGTTTATGTTTGACTTTGATGG    | CGTTGGGCTCTCTCAGTTCC      |
| DRB1  | AGCCTAAGGTGACTGTGTATCC       | CAGACCGTGCTCTCCATTCC      |
| DQA1  | CAGGAGCAGAAGAGTGGACTTG       | AGATGGAGGTTACTGAGGAATTAGG |
| DQB1  | GCCCTCAACCACCACAACC          | GCCTCCAATGCCACTCAGC       |
| GAPDH | AATGAATGGGCAGCCGTTA          | TAGCCTCGCTCCACCTGACT      |

#### ChIP primers

| Location | Forward (5'- 3')   | Reverse (5'- 3')     |
|----------|--------------------|----------------------|
| C1       | GAGGGCAGGAGGAACAGG | TTGTCGTCTAGTGGCTGAGG |
| C15      | GCCATTGGGTATCAGG   | GGTCCCAGAACATTCC     |

#### Quantitative 3C primers sets

| Primer Sets | Anchor Primer (5'- 3')     | Restriction Fragment Primer (5'- 3') |
|-------------|----------------------------|--------------------------------------|
| C1-DRA      | TGCTGCTGCTGCTGAATATG       | TGAATGAGGACTTCTTGCTGATG              |
| C1-CL1      | TGCTGCTGCTGCTGAATATG       | CACTTCCACATCTTGTCCCTACC              |
| C1-CL2      | ACTGCTGCTGCTGCTG           | TCTTCTGGAGAAATAAGTTAGGG              |
| C1-P12      | TGCTGCTGCTGCTGAATATG       | GACTGAAGAAGAGCGAGACC                 |
| C1-XL9      | TGCTGCTGCTGCTGAATATG       | TTATAGACAAATGGGCGAGGAAG              |
| XL9-C2      | ACCTCCACAATGTAGTTTCTAATATG | GCACTCATCAGAACTCTTTATCC              |
| XL9-CL1     | GCACCTACCCTCACTTTCATAC     | CACTTCCACATCTTGTCCCTACC              |
| XL9-CL4     | GCACCTACCCTCACTTTCATAC     | CCCTGACTCCTTTCCTTGG                  |
| XL9-CL5     | GCACCTACCCTCACTTTCATAC     | GCATAAGAAGACTCCATTGTGAAC             |
